# Supplementary material
Source: Springer Nature journal article supplement (https://www.springermedizin.de/resource/supplementary/12963_2014_242_MOESM4_ESM.pdf/9572432)

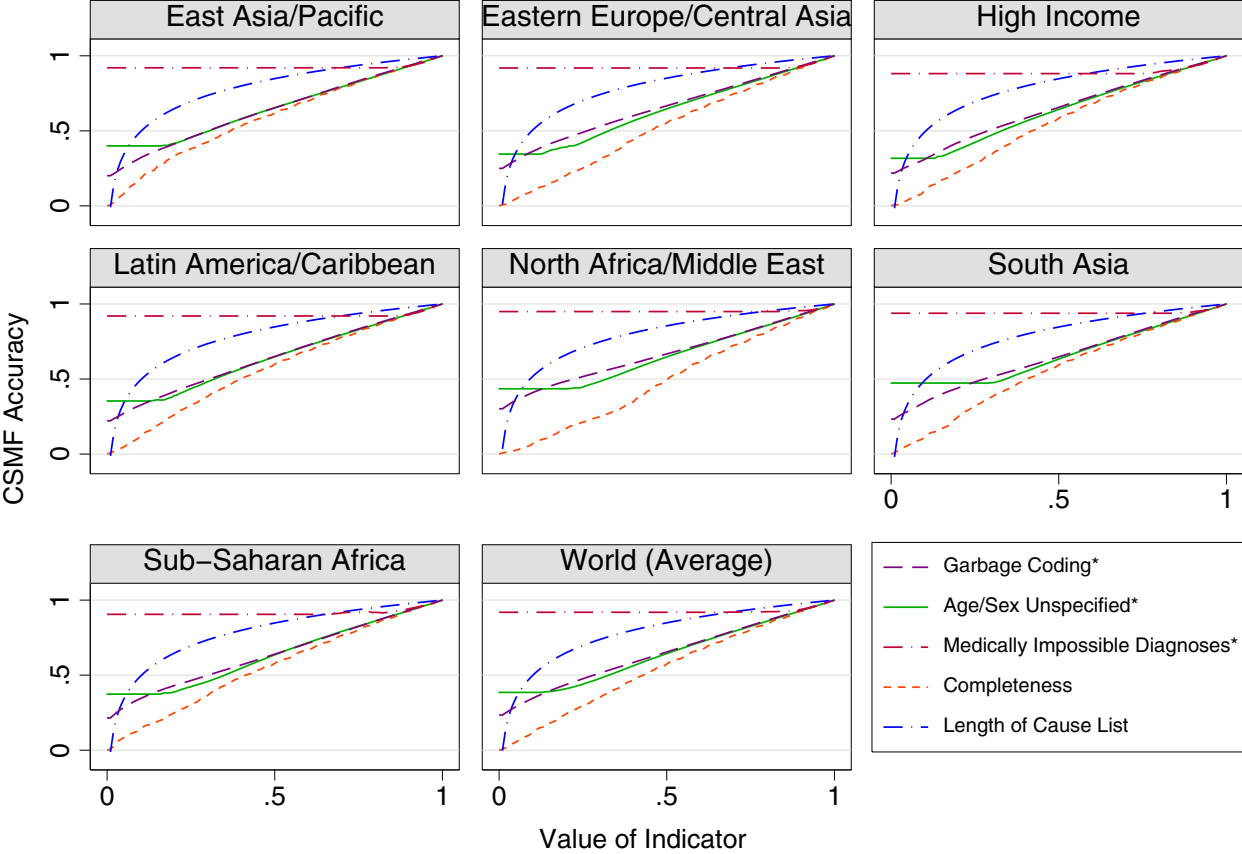

Supplement: MOESM4 [file 9572432]
